# Supplementary material for: Analytical sensitivity and effectiveness of different SARS-CoV-2 testing options
Source: bioRxiv or medRxiv preprint supplement (doi:10.1101/2021.11.26.21265946), 2021-11-28
Supplement: Supplementary file [file media-1.pdf]

**SUPPLEMENTAL TABLES**

**Supplemental Table 1.** Ct values in Roche cobas SARS-CoV-2 RNA test on standard dilutions before and after inactivation by beta-propiolactone.

| Standard    |          | A-series |        | B-series |        |
|-------------|----------|----------|--------|----------|--------|
|             |          | ORFa/b   | E gene | ORFa/b   | E gene |
| Viral state | Dilution | Ct       | Ct     | Ct       | Ct     |
| native      | 10       | 21.95    | 22.10  | 21.78    | 21.96  |
| native      | 100      | 25.05    | 25.13  | 24.91    | 25.18  |
| native      | 1000     | 27.87    | 28.20  | 28.09    | 28.32  |
| inactivated | 10       | 23.54    | 24.55  | 23.77    | 24.67  |
| inactivated | 100      | 26.93    | 27.87  | 26.95    | 27.86  |
| inactivated | 1000     | 30.15    | 30.99  | 30.04    | 30.95  |

**Supplemental Table 2a.** Ct values on WHO and BioQ SARS-CoV-2 standard dilution series in cobas PCR assay

| WHO<br>20/146<br>IU/mL                  | series A   |          | series B   |          |
|-----------------------------------------|------------|----------|------------|----------|
|                                         | ORF<br>Ct1 | E<br>Ct2 | ORF<br>Ct1 | E<br>Ct2 |
| 100000                                  | 27.63      | 27.78    | 27.31      | 27.38    |
| 30000                                   | 29.16      | 29.26    | 29.43      | 29.61    |
| 10000                                   | 30.71      | 30.82    | 30.39      | 30.61    |
| 3000                                    | 32.20      | 32.61    | 33.07      | 33.05    |
| 1000                                    | 32.94      | 33.37    | 33.27      | 33.77    |
| BioQ<br>inactivated<br>RNA<br>copies/mL | ORF<br>Ct1 | E<br>Ct2 | ORF<br>Ct1 | E<br>Ct2 |
| 33784                                   | 26.94      | 27.75    | 26.54      | 27.30    |
| 11249                                   | 28.74      | 29.60    | 28.78      | 29.68    |
| 3378                                    | 30.34      | 31.25    | 30.09      | 31.02    |
| 1125                                    | 31.75      | 32.75    | 31.92      | 32.56    |
| 338                                     | 33.17      | 34.03    | 33.26      | 34.21    |

**Supplemental Table 2b.** Potency of BioQ inactivated standard against WHO 20/146 standard in cobas SARS-CoV-2 PCR assay

| Target | parameter | Value (95% CI)   |
|--------|-----------|------------------|
| ORF    | delta Ct  | 2.10 (1.78-2.42) |
|        | IU/copy   | 4.29 (3.44-5.36) |
| E      | delta Ct  | 1.42 (1.13-1.72) |
|        | IU/copy   | 2.68 (2.19-3.29) |

**Supplemental Table 3.** Estimated assay conversion times relative to the most sensitive assay, i.e. cobas PCR (Supplemental table 3a) and relative to an assumed infectivity threshold of 1000 NAT detectable RNA copies/mL equivalent to 1 TCID<sub>50</sub> (Supplemental table 3b) during ramp up phase of viremia of B.1 (Wuhan) type SARS-CoV-2 virus and the B.1.617.2 (delta) variant assuming a 10-fold and 10,000 fold daily rise of viral load respectively.

Supplemental table 3a

| assay                    | 50% LOD<br>copies/mL <sup>^</sup> | B.1 (Wuhan) type |       | B1.617.2<br>(delta) variant |
|--------------------------|-----------------------------------|------------------|-------|-----------------------------|
|                          |                                   | days             | hours | hours                       |
| cobas PCR                | 1.8                               | 0                | 0     | 0                           |
| Aptima TMA               | 6.6                               | 0.56             | 13.4  | 3.3                         |
| cobas MP6 PCR            | 11.1                              | 0.78             | 18.7  | 4.7                         |
| SAMBA                    | 15.0                              | 0.91             | 21.8  | 5.4                         |
| LAMP                     | 22.8                              | 1.09             | 26.2  | 6.6                         |
| 1 TCID <sub>50</sub> /mL | 1000                              | 2.74             | 65.9  | 16.5                        |
| Fluorecare antigen       | 50000                             | 4.44             | 106.5 | 26.6                        |
| Panbio antigen           | 75000                             | 4.61             | 110.7 | 27.7                        |
| Roche antigen            | 100000                            | 4.74             | 113.7 | 28.4                        |

<sup>^</sup>50% NAT LODs or ± antigen LODs on native standard before inactivation

Supplemental table 3b

| assay                    | 50% LOD<br>copies/mL <sup>^</sup> | B.1 (Wuhan) type |       | B.1.617.2<br>(delta) variant |
|--------------------------|-----------------------------------|------------------|-------|------------------------------|
|                          |                                   | days             | hours | hours                        |
| cobas PCR                | 1.8                               | -2.74            | -65.9 | -16.5                        |
| Aptima TMA               | 6.6                               | -2.19            | -52.5 | -13.1                        |
| cobas MP6 PCR            | 11.1                              | -1.97            | -47.2 | -11.8                        |
| SAMBA                    | 15.0                              | -1.84            | -44.1 | -11.0                        |
| LAMP                     | 22.8                              | -1.65            | -39.6 | -9.9                         |
| 1 TCID <sub>50</sub> /mL | 1000                              | 0.00             | 0.0   | 0.0                          |
| Fluorecare antigen       | 50000                             | 1.69             | 40.6  | 10.2                         |
| Panbio antigen           | 75000                             | 1.87             | 44.8  | 11.2                         |
| Roche antigen            | 100000                            | 1.99             | 47.8  | 12.0                         |

<sup>^</sup>50% NAT LODs or ± antigen LODs on native standard before inactivation
